# Supplementary material
Source: Springer Nature journal article supplement (https://www.springermedizin.de/resource/supplementary/12890_2014_567_MOESM1_ESM.pdf/9505342)

Survival Functions: 15-day mortality

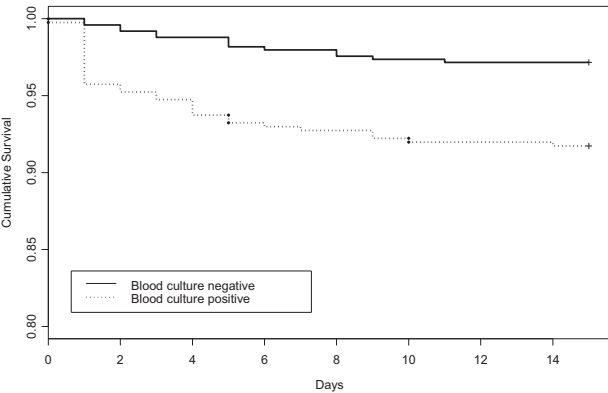

Survival Functions: 30-day mortality

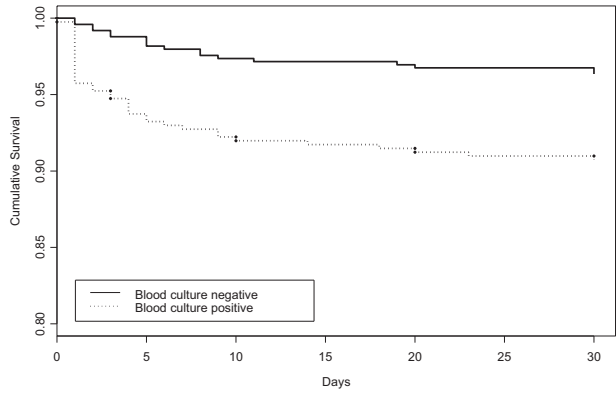

Supplement: MOESM1 [file 9505342]
